# Supplementary material
Source: PubMed Central journal article supplement (PMC2893977)
Supplement: E10-02-0111_1.pdf [file E10-02-0111_1.pdf]

## SUPPLEMENTAL DATA

### Figure legends to supplementary data

**Figure S1. Intracellular localization and degradation of  $\Delta$ ssPrA-3A** (A)  $\Delta$ ssCPY\* is degraded by the proteasome. Cycloheximide decay experiments were performed in  $\Delta$ *pdr5* cells in the absence and presence of MG132 (20  $\mu$ M) as described in Figure 1E. (B) Wild type cells expressing  $\Delta$ ssPrA and  $\Delta$ ssPrA-3A were fixed and stained with anti-HA antibodies to visualize substrates. Nuclei were stained with DAPI and anti-Kar2p antiserum was used to stain the ER and nuclear envelope. Arrowheads indicate the position of nuclei. Scale bar 2  $\mu$ m. (C) Cycloheximide-chase experiments were performed in wild type and  $\Delta$ *san1* cells expressing  $\Delta$ ssPrA and  $\Delta$ ssPrA-3A.

**Figure S2. Effect of substrate expression level on degradation.** (A) Relative substrate expression levels. Wild type cells expressing  $\Delta$ ssPrA or  $\Delta$ 2GFP controlled by the *GAS1* (LE, *Low Expression*) or *TDH3* (HE, *High Expression*) promoters were pulsed labeled for 10 min. Substrate proteins were immunoprecipitated from detergent extracts and quantified as described in materials and methods. (B) Degradation of  $\Delta$ ssPrA (LE) and  $\Delta$ 2GFP (LE) was measured in *SSA1* and *ssa1-45<sup>ts</sup>* by pulse chase analysis as described in Figure 1D. (C)  $\Delta$ ssPrA (LE) and  $\Delta$ 2GFP (LE) degradation in wild type and  $\Delta$ *ydj1* cells. (D)  $\Delta$ ssPrA (LE) and  $\Delta$ 2GFP (LE) degradation in wild type and  $\Delta$ *san1* cells. (E)  $\Delta$ ssPrA (LE) and  $\Delta$ 2GFP (LE) degradation in wild type and  $\Delta$ *san1* $\Delta$ *ubr1*. Error bars reflect the standard deviation of three independent experiments (panels A-E). (F) Wild type and  $\Delta$ *san1* $\Delta$ *ubr1* cells expressing  $\Delta$ ssPrA (LE) and  $\Delta$ 2GFP (LE) were processed and stained as described in Figure 2. Arrowheads indicate the position of nuclei. Scale bar, 2  $\mu$ m.

**Figure S3. Effect of San1p-V5 overexpression on its localization and substrate degradation**

(A) Intracellular localization of overexpressed San1p-V5. Wild type cells expressing  $\Delta$ ssPrA/San1p-V5 and  $\Delta$ 2GFP/San1p-V5 were grown fixed and stained with anti-V5 antibodies to visualize San1p-V5. Nuclei were stained with DAPI and anti-Kar2p antiserum was used to mark ER membranes. Arrowhead indicates the position of the nucleus. Scale bar, 2  $\mu$ m. (B) Turnover rates of  $\Delta$ ssPrA and  $\Delta$ 2GFP in wild type and San1p-V5 (OE) cells were determined by pulse chase analysis as in Figure 1C. Error bars reflect the standard deviation of three independent experiments. San1p-V5 expression was induced in 2 % galactose for 4 hours prior to experiments in panels A and B.

**Figure S4. Substrate degradation in nuclear export defective *xpo1-1* cells.** (A) Stability of  $\Delta$ ssPrA and  $\Delta$ 2GFP were examined in *XPO1* and *xpo1-1* cells by pulse chase analysis at 23°C (RT) and 30°C as described in Figure 1C. Error bars reflect the standard deviation of three independent experiments. (B) Localization of NLS-GFP-NES and NLS-GFP-P12 in *xpo1-1* cells were performed by confocal microscopy at temperatures indicated. NLS-GFP-NES is a reporter protein for nuclear export (Stade *et al.*, 1997). Nuclei were stained with Hoechst. Scale bar, 2  $\mu$ m.

**Figure S5. Analysis of *SSA1-4* single and double mutants in CytoQC.** (A) Pulse chase analysis of  $\Delta$ ssPrA and  $\Delta$ 2GFP were performed on wild type and single mutant strains indicated as described in Figure 1C. (B) Degradation of  $\Delta$ ssPrA and  $\Delta$ 2GFP was measured in *ssa* double mutants by pulse-chase analysis as described in Figure 1C. Error bars reflect the standard

deviation of three independent experiments (panels A and B). Data obtained for  $\Delta$ ssa1 $\Delta$ ssa2 are shown in Figure 7.

**Figure S6. Temperature effect on substrate localization.** Wild type cells expressing  $\Delta$ ssPrA were grown to log phase at 30°C and incubated at 30°C or 37°C for 60 min. Cells were fixed and stained for  $\Delta$ ssPrA (green channel), ER/nuclear envelope (anti-Kar2p, red channel), and DNA (DAPI) as described in Figure 2. Arrowheads indicate the positions of  $\Delta$ ssPrA cytosolic forms. Scale bar, 2  $\mu$ m.

**Figure S7. Doa10p is not required for  $\Delta$ ssPrA and  $\Delta$ 2GFP degradation.** Turnover rates of  $\Delta$ ssPrA and  $\Delta$ 2GFP in wild type and  $\Delta$ doa10 cells were determined by pulse chase analysis as in Figure 1C. Error bars reflect the standard deviation of three independent experiments.

## TABLES

**Table S1. Strains used in this study**

| Strain | Genotype                                                                                                                                                                                          | Source                        |
|--------|---------------------------------------------------------------------------------------------------------------------------------------------------------------------------------------------------|-------------------------------|
| W303   | <i>MATa</i> , <i>leu2-3,112</i> , <i>his3-11</i> , <i>trp1-1</i> , <i>ura3-1</i> , <i>can1-100</i> , <i>ade2-1</i>                                                                                | P. Walter (UCSF)              |
| SMY676 | <i>MATa</i> , <i>leu2-3,112</i> , <i>his3-11</i> , <i>ura3-52</i> , <i>trp1<math>\Delta</math>1</i> , <i>lys2</i> , <i>ssa2::LEU2</i> , <i>ssa3::TRP1</i> , <i>ssa4::LYS2</i>                     | J. Brodsky<br>(U. Pittsburgh) |
| SMY677 | <i>MATa</i> <i>leu2-3,112</i> , <i>his3-11</i> , <i>ura3-52</i> , <i>trp1<math>\Delta</math>1</i> , <i>lys2</i> , <i>ssa1-45::URA3</i> , <i>ssa2::LEU</i> , <i>ssa3::TRP1</i> , <i>ssa4::LYS2</i> | J. Brodsky<br>(U. Pittsburgh) |
| RPY147 | <i>MATa</i> , pRP21, W303 background                                                                                                                                                              | This study                    |
| RPY338 | <i>MATa</i> , <i>ssa1::KANMX</i> , <i>ssa2::KANMX</i> , pRP21, W303 background                                                                                                                    | This study                    |
| RPY340 | <i>MATa</i> , pRP61, W303 background                                                                                                                                                              | This study                    |
| RPY341 | <i>MATa</i> , pRP58, W303 background                                                                                                                                                              | This study                    |
| RPY205 | <i>MATa</i> , pRP42, W303 background                                                                                                                                                              | This study                    |
| RPY206 | <i>MATa</i> , pRP44, W303 background                                                                                                                                                              | This study                    |
| RPY235 | <i>MATa</i> , pRP51, W303 background                                                                                                                                                              | This study                    |
| RPY236 | <i>MATa</i> , pRP52, W303 background                                                                                                                                                              | This study                    |
| RPY252 | <i>MATa</i> , <i>leu2-3,112</i> , <i>his3-11</i> , <i>ura3-52</i> , <i>trp1<math>\Delta</math>1</i> , <i>lys2</i> , <i>ssa2::LEU2</i> , <i>ssa3::TRP1</i> , <i>ssa4::LYS2</i> , pRP51             | This study                    |
| RPY239 | <i>MATa</i> , <i>leu2-3,112</i> , <i>his3-11</i> , <i>ura3-52</i> , <i>trp1<math>\Delta</math>1</i> , <i>lys2</i> , <i>ssa1-45::URA3</i> ,                                                        | This study                    |

|        |                                                                                                                   |            |
|--------|-------------------------------------------------------------------------------------------------------------------|------------|
|        | <i>ssa2::LEU2, ssa3::TRP1, ssa4::LYS2, pRP51</i>                                                                  |            |
| RPY253 | <i>MATa, leu2-3,112, his3-11, ura3-52, trp1Δ1, lys2, ssa2::LEU2, ssa3::TRP1, ssa4::LYS2, pRP52</i>                | This study |
| RPY240 | <i>MATa, leu2-3, 112 his3-11, ura3-52, trp1Δ1, lys2, ssa1-45::URA3, ssa2::LEU2, ssa3::TRP1, ssa4::LYS2, pRP52</i> | This study |
| RPY250 | <i>MATa, ydj1::KANMX, pRP52, W303 background</i>                                                                  | This study |
| RPY251 | <i>MATa, ydj1::KANMX, pRP51, W303 background</i>                                                                  | This study |
| RPY267 | <i>MATa, leu2-3,112, his3-11, ura3-52, trp1Δ1, lys2, ssa2::LEU2, ssa3::TRP1, ssa4::LYS2, pRP42</i>                | This study |
| RPY266 | <i>MATa, leu2-3,112, his3-11, ura3-52, trp1Δ1, lys2, ssa1-45::URA3, ssa2::LEU2, ssa3::TRP1, ssa4::LYS2, pRP42</i> | This study |
| RPY269 | <i>MATa, leu2-3,112, his3-11, ura3-52, trp1Δ1, lys2, ssa2::LEU2, ssa3::TRP1, ssa4::LYS2, pRP44</i>                | This study |
| RPY268 | <i>MATa leu2-3,112, his3-11, ura3-52, trp1Δ1, lys2, ssa1-45::URA3, ssa2::LEU2, ssa3::TRP1, ssa4::LYS2, pRP44</i>  | This study |
| RPY275 | <i>MATa, san1::KANMX, pRP42, W303 background</i>                                                                  | This study |
| RPY276 | <i>MATa, san1::KANMX, pRP44, W303 background</i>                                                                  | This study |
| RPY277 | <i>MATa, san1::KANMX, pRP51, W303 background</i>                                                                  | This study |
| RPY278 | <i>MATa, san1::KANMX, pRP52, W303 background</i>                                                                  | This study |
| RPY299 | <i>MATa, ubr1::KANMX, pRP42, W303 background</i>                                                                  | This study |
| RPY300 | <i>MATa, ubr1::KANMX, pRP44, W303 background</i>                                                                  | This study |
| RPY301 | <i>MATa, ydj1::KANMX, pRP42, W303 background</i>                                                                  | This study |
| RPY302 | <i>MATa, ydj1::KANMX, pRP44, W303 background</i>                                                                  | This study |
| RPY342 | <i>MATa, pdr5::KANMX, pRP42, W303 background</i>                                                                  | This study |
| RPY343 | <i>MATa, pdr5::KANMX, pRP44, W303 background</i>                                                                  | This study |
| RPY403 | <i>MATa, san1::KANMX, ubr1::KANMX, pRP42, W303 background</i>                                                     | This study |
| RPY404 | <i>MATa, san1::KANMX, ubr1::KANMX, pRP44, W303 background</i>                                                     | This study |
| RPY344 | <i>MATa, ssa1::KANMX, pRP42, W303 background</i>                                                                  | This study |
| RPY345 | <i>MATa, ssa2::KANMX, pRP42, W303 background</i>                                                                  | This study |
| RPY346 | <i>MATa, ssa3::KANMX, pRP42, W303 background</i>                                                                  | This study |
| RPY347 | <i>MATa, ssa4::KANMX, pRP42, W303 background</i>                                                                  | This study |
| RPY348 | <i>MATa, ssa1::KANMX, ssa2::KANMX, pRP42, W303 background</i>                                                     | This study |
| RPY349 | <i>MATa, ssa1::KANMX, ssa3::KANMX, pRP42, W303 background</i>                                                     | This study |
| RPY350 | <i>MATa, ssa1::KANMX, ssa4::KANMX, pRP42, W303 background</i>                                                     | This study |
| RPY351 | <i>MATa, ssa2::KANMX, ssa3::KANMX, pRP42, W303 background</i>                                                     | This study |
| RPY352 | <i>MATa, ssa2::KANMX, ssa4::KANMX, pRP42, W303 background</i>                                                     | This study |
| RPY353 | <i>MATa, ssa3::KANMX, ssa4::KANMX, pRP42, W303 background</i>                                                     | This study |
| RPY354 | <i>MATa, ssa1::KANMX, pRP44, W303 background</i>                                                                  | This study |
| RPY355 | <i>MATa, ssa2::KANMX, pRP44, W303 background</i>                                                                  | This study |
| RPY356 | <i>MATa, ssa3::KANMX, pRP44, W303 background</i>                                                                  | This study |
| RPY357 | <i>MATa, ssa4::KANMX, pRP44, W303 background</i>                                                                  | This study |
| RPY358 | <i>MATa, ssa1::KANMX, ssa2::KANMX, pRP44, W303 background</i>                                                     | This study |
| RPY359 | <i>MATa, ssa1::KANMX, ssa3::KANMX, pRP44, W303 background</i>                                                     | This study |
| RPY360 | <i>MATa, ssa1::KANMX, ssa4::KANMX, pRP44, W303 background</i>                                                     | This study |
| RPY361 | <i>MATa, ssa2::KANMX, ssa3::KANMX, pRP44, W303 background</i>                                                     | This study |
| RPY362 | <i>MATa, ssa2::KANMX, ssa4::KANMX, pRP44, W303 background</i>                                                     | This study |
| RPY363 | <i>MATa, ssa3::KANMX, ssa4::KANMX, pRP44, W303 background</i>                                                     | This study |
| RPY401 | <i>MATa, san1::KANMX, ubr1::KANMX, pRP51, W303 background</i>                                                     | This study |
| RPY402 | <i>MATa, san1::KANMX, ubr1::KANMX, pRP52, W303 background</i>                                                     | This study |
| RPY403 | <i>MATa, san1::KANMX, ubr1::KANMX, pRP42, W303 background</i>                                                     | This study |
| RPY404 | <i>MATa, san1::KANMX, ubr1::KANMX, pRP44, W303 background</i>                                                     | This study |
| RPY430 | <i>MATa, doa10::KANMX, pRP42, W303 background</i>                                                                 | This study |
| RPY431 | <i>MATa, doa10::KANMX, pRP44, W303 background</i>                                                                 | This study |
| RPY437 | <i>MATa, pdr5::KANMX, pSK146 and pRS313, W303 background</i>                                                      | This study |
| RPY438 | <i>MATa, pdr5::KANMX, pSK146 and pRP42, W303 background</i>                                                       | This study |
| RPY439 | <i>MATa, pdr5::KANMX, pSK146 and pRP42, W303 background</i>                                                       | This study |

|        |                                                                           |                          |
|--------|---------------------------------------------------------------------------|--------------------------|
| KWY120 | <i>MATα, xpo1::Leu2</i> , expressing Xpo1p, W303 background               | K. Weis<br>(UC Berkeley) |
| KWY121 | <i>MATα, xpo1::Leu2</i> , expressing Xpo1-1p, W303 background             | K. Weis<br>(UC Berkeley) |
| SKY328 | <i>MATα, xpo1::Leu2</i> , expressing Xpo1p, pRPB42, W303 background       | This study               |
| SKY329 | <i>MATα, xpo1::Leu2</i> , expressing Xpo1p, pRPB44, W303 background       | This study               |
| SKY332 | <i>MATα, xpo1::Leu2</i> , expressing xpo1-1p, pRPB42, W303 background     | This study               |
| SKY333 | <i>MATα, xpo1::Leu2</i> , expressing xpo1-1p, pRPB44, W303 background     | This study               |
| SKY599 | <i>MATα, xpo1::Leu2</i> , expressing xpo1-1p, pKW430, W303 background     | This study               |
| SKY600 | <i>MATα, xpo1::Leu2</i> , expressing xpo1-1p, pKW431, W303 background     | This study               |
| SKY557 | <i>MATa, ssa1::KANMX, ssa2::KANMX</i> , pSK112 and pRP42, W303 background | This study               |
| SKY558 | <i>MATa, ssa1::KANMX, ssa2::KANMX</i> , pSK112 and pRP44, W303 background | This study               |
| SKY560 | <i>MATa, ssa1::KANMX, ssa2::KANMX</i> , pRS316 and pRP42, W303 background | This study               |
| SKY561 | <i>MATa, ssa1::KANMX, ssa2::KANMX</i> , pRS316 and pRP44, W303 background | This study               |
| SKY563 | <i>MATa</i> , pSK145 and pRP42, W303 background                           | This study               |
| SKY566 | <i>MATa</i> , pSK145 and pRP44, W303 background                           | This study               |
| SKY565 | <i>MATa</i> , pTS210 and pRP42, W303 background                           | This study               |
| SKY568 | <i>MATa</i> , pTS210 and pRP44, W303 background                           | This study               |
| SKY564 | <i>MATa</i> , pSK146 and pRP42, W303 background                           | This study               |
| SKY567 | <i>MATa</i> , pSK146 and pRP44, W303 background                           | This study               |

**Table S2. Plasmids used in this study**

| Plasmid | Protein     | Promoter   | Vector  | Source                |
|---------|-------------|------------|---------|-----------------------|
| pRP21   | ΔssCPY*     | $P_{TDH3}$ | pRS315* | This study            |
| pRP42   | ΔssPrA      | $P_{TDH3}$ | pRS313* | This study            |
| pRP44   | Δ2GFP       | $P_{TDH3}$ | pRS313* | This study            |
| pRP51   | ΔssPrA      | $P_{GAS1}$ | pRS313* | This study            |
| pRP52   | Δ2GFP       | $P_{GAS1}$ | pRS313* | This study            |
| pRP58   | PrA         | $P_{TDH3}$ | pRS313* | This study            |
| pRP61   | GFP         | $P_{TDH3}$ | pRS313* | This study            |
| pKW430  | NLS-GFP-NES | $P_{ADH}$  | pRS426  | K. Weis (UC Berkeley) |
| pKW431  | NLS-GFP-P12 | $P_{ADH}$  | pRS426  | K. Weis (UC Berkeley) |
| pSK112  | FLAG-Ssa1   | $P_{TDH3}$ | pRS316  | This study            |

|        |           |                  |        |            |
|--------|-----------|------------------|--------|------------|
| pSK145 | San1      | P <sub>GAL</sub> | pTS210 | This study |
| pSK146 | San1-V5H6 | P <sub>GAL</sub> | pTS210 | This study |

\*(Sikorski and Hieter, 1989)

**Table S3. Oligonucleotide primers used in this study**

| Primer | Plasmid              | Sequence (5' → 3')                                                    |
|--------|----------------------|-----------------------------------------------------------------------|
| RP06   | pRP21                | AGTTTCGACGGATCATAACATACGCATGATCTCATTGCAAAGACCG<br>TTGGGTAC            |
| RP57   | pRP58                | CGGGATCCCGATGTTTCAGCTTGAAAGCATTATTGCC                                 |
| RP61   | pRP58                | TCCCCCGGGGATCAAGCGTAATCTGGAACATCATAT                                  |
| RP63   | pRP61                | CGGGATCCCGATGAGTAAAGGAGAAGAAGAACTTTTCACTGG                            |
| RP64   | pRP61                | GCTCTAGAGCTTAAGCGTAATCTGGAACATCATATGGGTATTTGTAT<br>AGTTCATCCATGCCATGT |
| RP59   | pRP42                | AACCTGTTTCGACGGATCCCGATGAAAGTCCACAAGGCTAAAATT<br>TATA                 |
| RP65   | pRP44                | GAATTAGATGGTGATGTTAATGGGGCAACATACGGAAAAGTACC<br>CTTA                  |
| SK165  | pSK112               | ATGGATTACAAGGACGATGACGATAAAAATGTCAAAAAGCTGT<br>CGGTATTGATTTAG         |
| SK166  | pSK112               | TTAATCAACTTCTTCAACGGTTGG                                              |
| SK232  | pSK112               | CTGAGGATCCCGATGGATTACAAGGACGATGACGATAA                                |
| SK233  | pSK112               | ACTGTCTAGAGCTTAATCAACTTCTTCAACGGTTGGA                                 |
| SK246  | pSK145<br>and pSK146 | GTCAGGATCCCGATGAGTGAAAGTGGTCAAGAAC                                    |
| SK247  | pSK145               | GTCATCTAGACGTTATTGTGATGATCGTTGCTCATTG                                 |
| SK176  | pSK146               | GCGTGACATAACTAATTACATGATGCG                                           |

**A**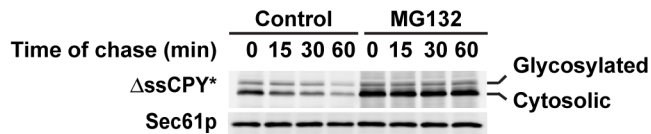**B**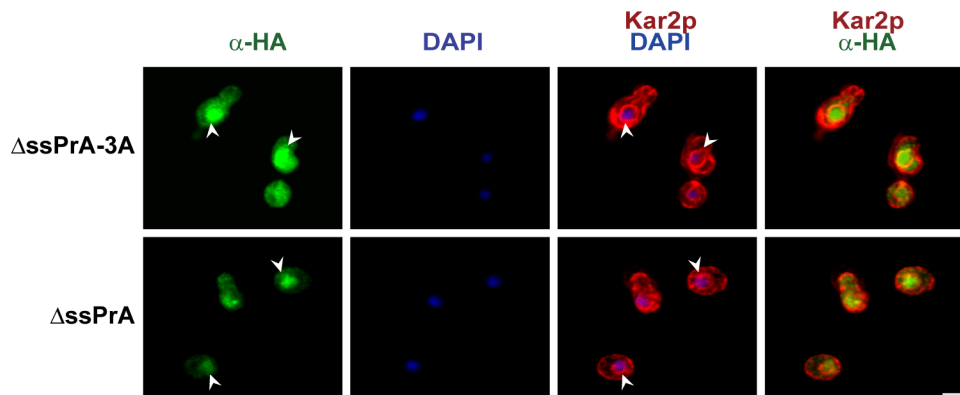**C**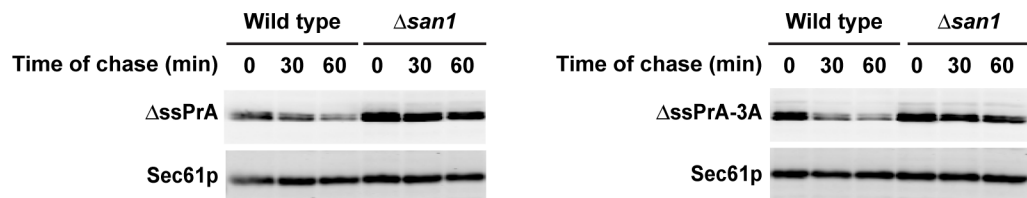**Figure S1**

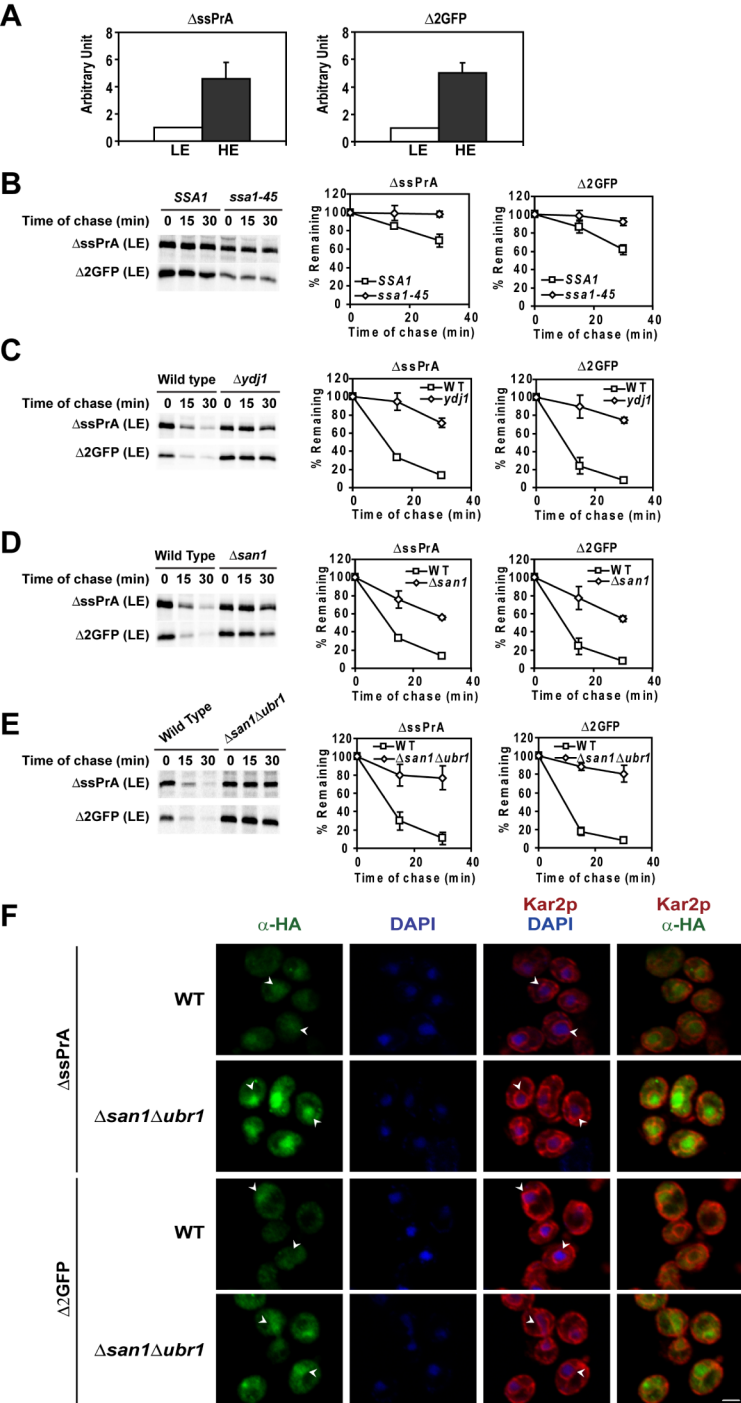

Figure S2



**A**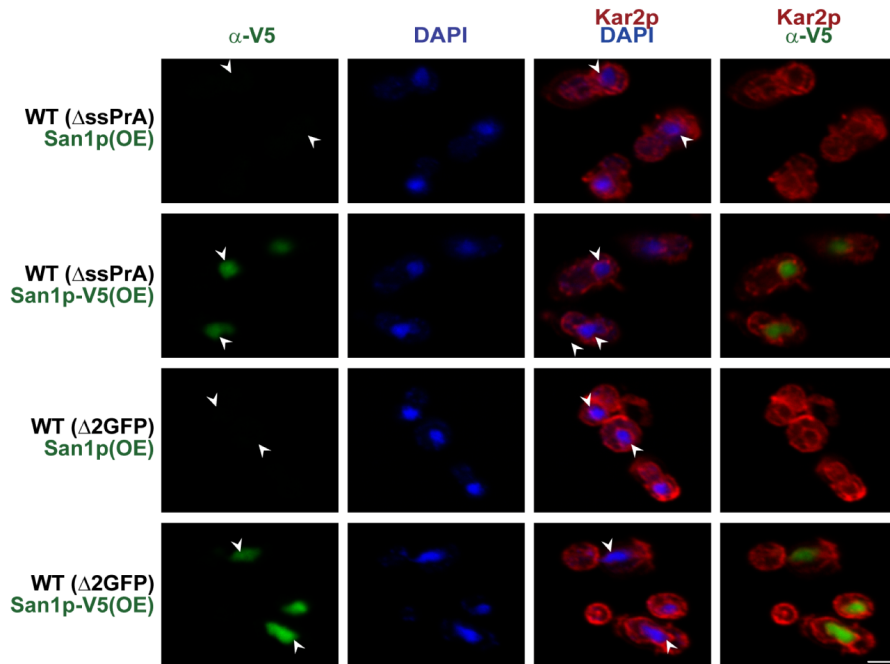**B**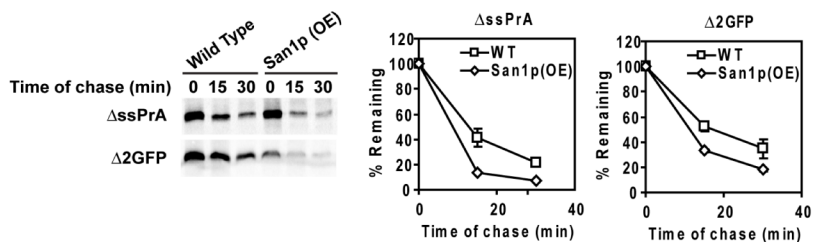**Figure S3**

**A**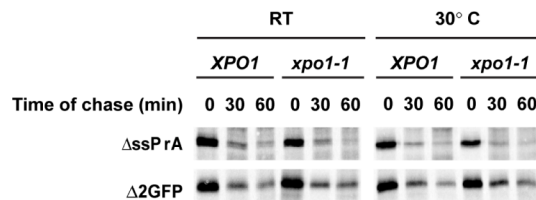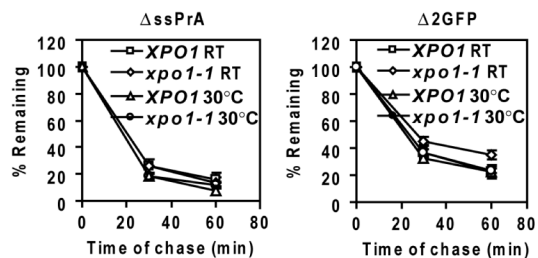**B**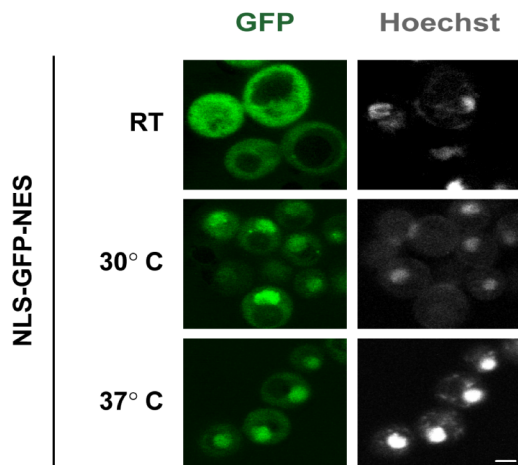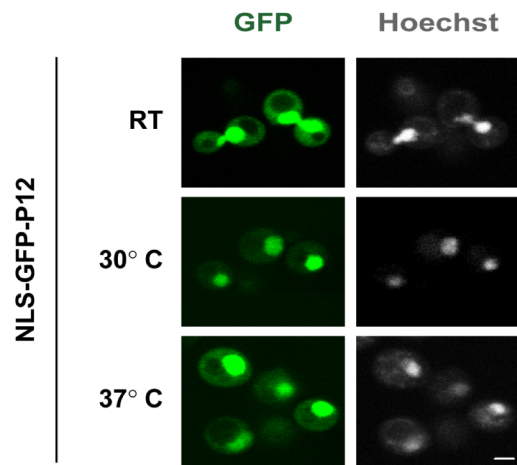**Figure S4**

**A**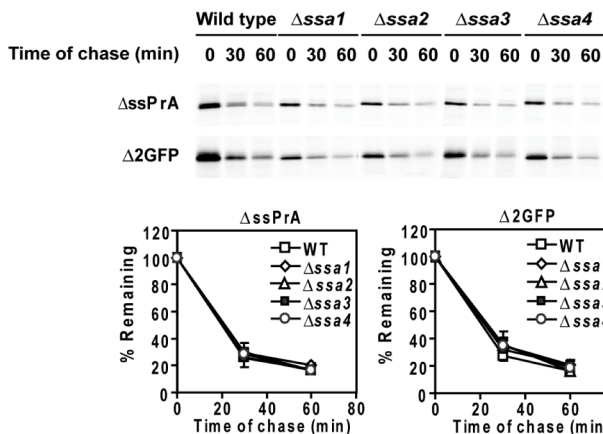**B**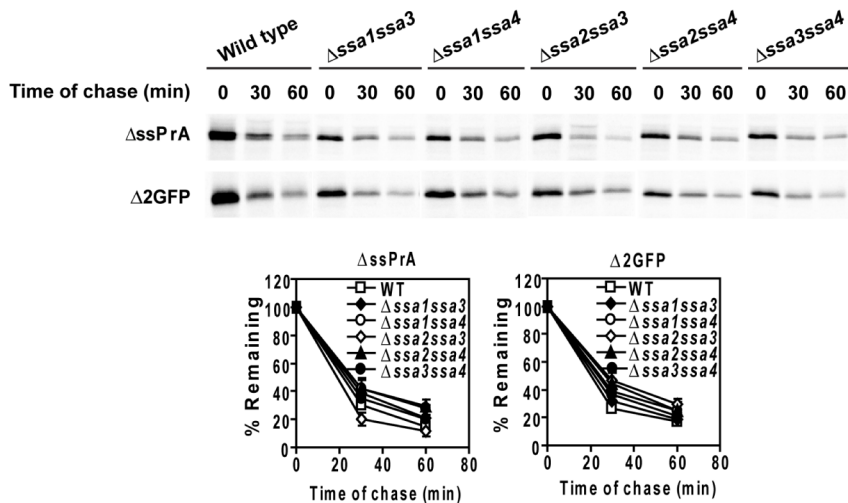**Figure S5**

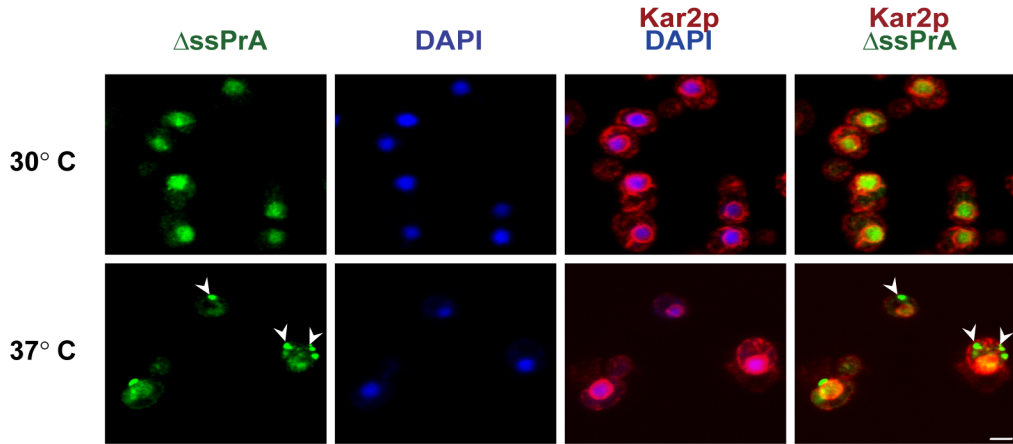

Figure S6

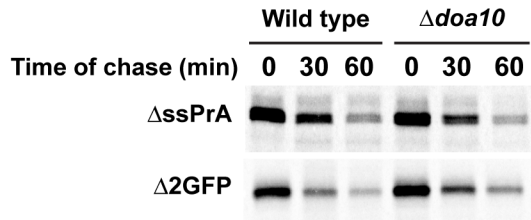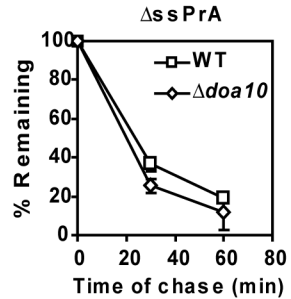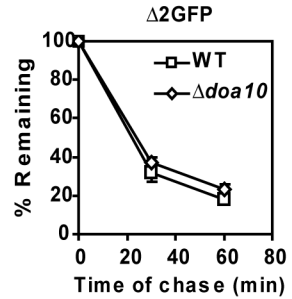

**Figure S7**
